# Supplementary material
Source: PubMed Central journal article supplement (PMC2978965)
Supplement: NIHMS238850-supplement-01.pdf [file NIHMS238850-supplement-01.pdf]

# New Moves—Preventing Weight-Related Problems in Adolescent Girls

## A Group-Randomized Study

Dianne R. Neumark-Sztainer, PhD, MPH, RD, Sarah E. Friend, MPH, RD, Colleen F. Flattum, MS, RD, Peter J. Hannan, MStat, Mary T. Story, PhD, RD, Katherine W. Bauer, MS, Shira B. Feldman, MPH, RD, Christine A. Petrich, MED

### Appendix A

#### Description of variables assessed in intervention and control conditions

| Variable                                        | Description of assessment                                                                                                                                                                                                                                                                                                                                                                                                                                                                                                                                                                                                                                                                                                                                                                                                                                                  | Psychometrics <sup>a</sup>             |
|-------------------------------------------------|----------------------------------------------------------------------------------------------------------------------------------------------------------------------------------------------------------------------------------------------------------------------------------------------------------------------------------------------------------------------------------------------------------------------------------------------------------------------------------------------------------------------------------------------------------------------------------------------------------------------------------------------------------------------------------------------------------------------------------------------------------------------------------------------------------------------------------------------------------------------------|----------------------------------------|
| <b>Body composition</b>                         |                                                                                                                                                                                                                                                                                                                                                                                                                                                                                                                                                                                                                                                                                                                                                                                                                                                                            |                                        |
| % body fat (DXA)                                | Percent body fat was estimated using DXA (Lunar Model, Madison, WI)                                                                                                                                                                                                                                                                                                                                                                                                                                                                                                                                                                                                                                                                                                                                                                                                        |                                        |
| BMI                                             | Weight and height were measured by trained New Moves staff, and BMI percentiles were calculated using CDC Growth Charts. <sup>1,2</sup>                                                                                                                                                                                                                                                                                                                                                                                                                                                                                                                                                                                                                                                                                                                                    |                                        |
| <b>Physical activity</b>                        |                                                                                                                                                                                                                                                                                                                                                                                                                                                                                                                                                                                                                                                                                                                                                                                                                                                                            |                                        |
| Total physical activity (30-minute blocks/day)  | Physical activity was assessed with the 3-DPAR, <sup>3</sup> which asks participants to recall the activities that they participated in during the majority of each half-hour time block between 6:00AM and 12MN on the 3 days prior to the day of data collection. A list of 65 common activities was provided, and participants selected the activity that they participated in for the majority of every half-hour block. If a participant recorded engaging in a physical activity during a half-hour block, she was also asked to report whether her exertion level during that block was light, moderate, hard, or very hard. For each physical activity at each exertion level, a corresponding MET value was identified. <sup>4,5</sup> Total physical activity was defined as a per day average of number of blocks for which any physical activity was reported. |                                        |
| Total MVPA (30-minute blocks/day)               | MVPA was assessed using the 3-DPAR. Each girl's average daily MVPA was calculated as the average number of blocks during which girls reported engaging in an activity with a MET value greater than 3. <sup>3,6,7</sup>                                                                                                                                                                                                                                                                                                                                                                                                                                                                                                                                                                                                                                                    | Test/retest $r = 0.717$                |
| Stage of change: physical activity              | One question with five response categories ranging from <i>I am not physically active and do not intend to become active to I am physically active on most days of the week and have been for longer than 6 months</i> . Source: New Moves <sup>8</sup> modified from Marcus. <sup>9</sup>                                                                                                                                                                                                                                                                                                                                                                                                                                                                                                                                                                                 | Test/retest $r = 0.85$                 |
| Goal-setting: physical activity                 | Five questions on frequency of setting goals related to physical activity; five Likert response categories. Range 5–25. Modified from Project GRAD. <sup>10</sup>                                                                                                                                                                                                                                                                                                                                                                                                                                                                                                                                                                                                                                                                                                          | Test/retest $r = 0.90$<br>alpha = 0.80 |
| Self-efficacy for physical activity             | Six questions regarding confidence to implement new activities and be active in different situations; five Likert response categories. Range 6–30. Source: New Moves. <sup>11</sup>                                                                                                                                                                                                                                                                                                                                                                                                                                                                                                                                                                                                                                                                                        | Test/retest $r = 0.78$<br>alpha = 0.79 |
| <b>Sedentary Activity</b>                       |                                                                                                                                                                                                                                                                                                                                                                                                                                                                                                                                                                                                                                                                                                                                                                                                                                                                            |                                        |
| Total sedentary activity (30-minute blocks/day) | Total sedentary activity was assessed with 3-DPAR (see fuller explanation for total physical activity). Average number of 30-minute blocks per day for which any sedentary activity was reported. <sup>12,13</sup>                                                                                                                                                                                                                                                                                                                                                                                                                                                                                                                                                                                                                                                         |                                        |
| TV use (30-minute blocks/day)                   | TV use was assessed with 3-DPAR, per day average of number of blocks for which <i>watching TV or movies</i> was reported.                                                                                                                                                                                                                                                                                                                                                                                                                                                                                                                                                                                                                                                                                                                                                  |                                        |

| Variable                                       | Description of assessment                                                                                                                                                                                                                                                                                                                                                                                                                                                                                    | Psychometrics <sup>a</sup>                                                   |
|------------------------------------------------|--------------------------------------------------------------------------------------------------------------------------------------------------------------------------------------------------------------------------------------------------------------------------------------------------------------------------------------------------------------------------------------------------------------------------------------------------------------------------------------------------------------|------------------------------------------------------------------------------|
| Stage of change: TV                            | One question with five response categories ranging from <i>I watch more than 1 hour of TV/Video/DVD each day and do not intend to watch less</i> to <i>I watch 1 hour or less of TV/Video/DVD on most days of the week and have been doing so for longer than 6 months</i> . Range: 1–5. Modified from New Moves <sup>8</sup> and Marcus. <sup>9</sup>                                                                                                                                                       | Test/retest $r = 0.81$                                                       |
| <b>Dietary intake</b>                          |                                                                                                                                                                                                                                                                                                                                                                                                                                                                                                              |                                                                              |
| Fruits and vegetable intake (servings/day)     | One 24-hour dietary recall administered in-person by research staff trained and certified to use the NDS-R. <sup>14</sup> Juices, avocado, fried fruit/vegetables, legumes, and vegetable-based savory snacks were excluded.                                                                                                                                                                                                                                                                                 |                                                                              |
| Sugar-sweetened beverage intake (servings/day) | Based on one 24-hour dietary recall (see description above for fruit/vegetable intake). Sweetened beverages include regular soda and other non-diet sweetened drinks, such as sweetened tea, sweetened coffee, sweetened sports drinks, and fruit drinks. Diet drinks and 100% fruit juice were excluded.                                                                                                                                                                                                    |                                                                              |
| Stage of change: fruits and vegetables         | One question with five response categories ranging from <i>I do not eat 5 or more servings of fruits and vegetables per day and do not intend to start to I eat at least 5 or more servings of fruits and vegetables per day and have been doing so for longer than 6 months</i> . Range: 1–5. Modified from New Moves <sup>8</sup> and Marcus. <sup>9</sup>                                                                                                                                                 | Test/retest $r = 0.85$                                                       |
| Goal-setting: healthy eating                   | Four questions on frequency of setting goals related to healthy eating; five Likert response categories. Range: 4–20. Modified from Project GRAD. <sup>10</sup>                                                                                                                                                                                                                                                                                                                                              | Test/retest $r = 0.82$<br>alpha = 0.80                                       |
| <b>Eating patterns</b>                         |                                                                                                                                                                                                                                                                                                                                                                                                                                                                                                              |                                                                              |
| Breakfast (days/week)                          | One question on the number of days breakfast was eaten in the past week. Range: 0–7. Modified from New Moves <sup>8</sup> and Project EAT. <sup>15</sup> Original source: Cusatis. <sup>16</sup>                                                                                                                                                                                                                                                                                                             | Test/retest $r = 0.75$                                                       |
| Portion control                                | Four questions on food choice behaviors and portion size awareness; four Likert response categories. Range: 4–16. Created for New Moves.                                                                                                                                                                                                                                                                                                                                                                     | Test/retest $r = 0.87$<br>alpha = 0.79                                       |
| Stage of change: breakfast                     | One question with five response categories ranging from <i>I do not eat breakfast and do not intend to start to I eat breakfast everyday and have been doing so for longer than 6 months</i> . Range: 1–5. Modified from New Moves <sup>8</sup> and Marcus. <sup>9</sup>                                                                                                                                                                                                                                     | Test/retest $r = 0.89$                                                       |
| Stage of change: portion control               | One question with five response categories ranging from <i>I do not pay attention to the portion sizes of the food I eat and do not intend to start to I pay attention to the portion sizes of the food I eat and have been doing so for longer than 6 months</i> . Range: 1–5. Modified from New Moves <sup>8</sup> and Marcus. <sup>9</sup>                                                                                                                                                                | Test/retest $r = 0.90$                                                       |
| <b>Unhealthy weight control behaviors</b>      |                                                                                                                                                                                                                                                                                                                                                                                                                                                                                                              |                                                                              |
| Unhealthy weight control behaviors             | Ten questions assessing use of unhealthy weight control behaviors in the past month (yes/no). Behavior categories included fasted, ate very little, took diet pills, made myself vomit, used laxatives, used diuretics, used food substitutes, skipped meals, smoked more cigarettes, and went on a diet. If a respondent reported doing any of these behaviors, they were classified as having used unhealthy weight control behaviors. Modified from New Moves <sup>8</sup> and Project EAT. <sup>17</sup> | Test/retest $r = 0.80$                                                       |
| Binge eating                                   | Two questions assessing binge eating in the past month (yes/no) and perceived loss of control during binge eating (yes/no). Binge eating defined as responding “Yes” to both questions. Modified from Project EAT <sup>18</sup> and adapted from Yanovski. <sup>19</sup>                                                                                                                                                                                                                                     | Test/retest $r = 0.88$ for 1st question and 1.0 for 2 <sup>nd</sup> question |
| <b>Body and self-image</b>                     |                                                                                                                                                                                                                                                                                                                                                                                                                                                                                                              |                                                                              |
| Athletic competence                            | Five questions assessing perceived athletic competence as compared to other teenagers. Range: 5–20. <sup>20</sup>                                                                                                                                                                                                                                                                                                                                                                                            | Test/retest $r = 0.88$<br>alpha = 0.73                                       |
| Appearance                                     | Five questions assessing perceived physical appearance as compared to other teenagers. Range: 5–20. <sup>20</sup>                                                                                                                                                                                                                                                                                                                                                                                            | Test/retest $r = 0.75$<br>alpha = 0.86                                       |
| Self-worth                                     | Five questions assessing perceived global self-worth as compared to other teenagers. Range: 5–20. <sup>20</sup>                                                                                                                                                                                                                                                                                                                                                                                              | Test/retest $r = 0.78$<br>alpha = 0.79                                       |
| Body satisfaction                              | Ten questions assessing satisfaction with weight, height, and specific parts of the body; six Likert response categories. Range: 10–60. Adapted from the Body Shape Satisfaction Scale <sup>21</sup> and the Body Cathexis scale. <sup>22</sup>                                                                                                                                                                                                                                                              | Test/retest $r = 0.84$<br>alpha = 0.92                                       |

| Variable                              | Description of assessment                                                                                                                                           | Psychometrics <sup>a</sup>             |
|---------------------------------------|---------------------------------------------------------------------------------------------------------------------------------------------------------------------|----------------------------------------|
| <b>Support for PA</b>                 |                                                                                                                                                                     |                                        |
| Friend support for physical activity  | One question on friend support for physical activity; four Likert response options. Range: 1–4. Modified from Project EAT <sup>15</sup> and New Moves. <sup>8</sup> | Test/retest $r = 0.65$                 |
| Teacher support for physical activity | One question on teacher support for physical activity; four Likert response options. Range: 1–4. Modified from New Moves. <sup>8</sup>                              | Test/retest $r = 0.76$                 |
| Family support for physical activity  | Five questions on family support for physical activity; five Likert response options. Range: 5–25. Adapted from PACE+. <sup>23</sup>                                | Test/retest $r = 0.81$<br>alpha = 0.83 |
| <b>Support for healthy eating</b>     |                                                                                                                                                                     |                                        |
| Friend support for healthy eating     | One question on friend support for healthy eating; four Likert response options. Range: 1–4. Modified from Project EAT <sup>15</sup> and New Moves. <sup>8</sup>    | Test/retest $r = 0.73$                 |
| Teacher support for healthy eating    | One question on teacher support for healthy eating; four Likert response options. Range: 1–4. Modified from New Moves. <sup>8</sup>                                 | Test/retest $r = 0.68$                 |
| Parent support for healthy eating     | One question on mother support for healthy eating and one on father support; four Likert response options. Range: 2–8. Modified from Project EAT. <sup>15</sup>     | Test/retest $r = 0.81$<br>alpha = 0.62 |

<sup>a</sup> Test/retest data come from pilot study conducted on girls similar to the New Moves study population ( $n=48$ ). Cronbach's alpha values come from final study population ( $n=356$ ).

3-DPAR, 3-Day Physical Activity Recall Survey; DXA, dual-energy x-ray absorptometry; MVPA, moderate-to-vigorous physical activity; NDS-R, Nutrition Data System for Research, version 2006, Nutrition Coordinating Center, University of Minnesota, Minneapolis; Project GRAD, Graduation Really Achieves Dreams; Project EAT, Eating Among Teens

## References for Appendix A

1. Krebs NF, Himes JH, Jacobson D, Nicklas TA, Guilday P, Styne D. Assessment of child and adolescent overweight and obesity. *Pediatrics* 2007;120 (4S):S193–S228.
2. Kuczmarski RJ, Ogden CL, Grummer-Strawn LM, et al. CDC Growth Charts: U.S. Adv Data 2000;314:1–27.
3. Pate RR, Ross R, Dowda M, Trost SG, Sirard JR. Validation of a three-day physical activity recall instrument in female youth. *Pediatr Exerc Sci* 2003;15:257–65.
4. Ainsworth BE, Haskell WL, Whitt MC, et al. Compendium of physical activities: an update of activity codes and MET intensities. *Med Sci Sports Exerc* 2000;32(9S):S498–S504.
5. Ainsworth BE, Haskell WL, Leon AS, et al. Compendium of physical activities: classification of energy costs of human physical activities. *Med Sci Sports Exerc* 1993;25(1):71–80.
6. Pate RR, Dowda M, O'Neill JR, Ward DS. Change in physical activity participation among adolescent girls from 8th to 12th grade. *J Phys Activity Health* 2007;4(1):3–16.
7. McMurray RG, Ring KB, Treuth MS, et al. Comparison of two approaches to structured physical activity surveys for adolescents. *Med Sci Sports Exerc* 2004;36(12):2135–43.
8. Neumark-Sztainer D, Story M, Hannan PJ, Rex J. New Moves: A school-based obesity prevention program for adolescent girls. *Prev Med* 2003;37:41–51.
9. Marcus BH, Selby VC, Niaura RS, Rossi JS. Self-efficacy and the stages of exercise behavior change. *Res Q Exerc Sports* 1992;63(1):60–6.

10. Saelens B, Gehrman C, Sallis J, Calfas K, Sarkin J, Caparosa S. Use of self-management strategies in a 2-year cognitive-behavioral intervention to promote physical activity. *Behav Ther* 2000;31:365-79.
11. Neumark-Sztainer D, Story M, Hannan PJ, Tharp T, Rex J. Factors associated with changes in physical activity: A cohort study of inactive adolescent girls. *Arch Pediatr Adolesc Med* 2003;157:803-10.
12. Dowda M, Pate RR, Felton GM, et al. Physical activities and sedentary pursuits in African American and Caucasian girls. *Res Q Exerc Sport* 2004;75(4):352-60.
13. Dowda M, Saunders RP, Hastings L, Gay JM, Evans AE. Physical activity and sedentary pursuits of children living in residential children's homes. *J Phys Activity Health* 2009;6(2):195-202.
14. McPherson RS, Hoelscher DM, Alexander M, Scanlon KS, Serdula MK. Dietary assessment methods among school-aged children: validity and reliability. *Prev Med* 2000;31:S11-S33.
15. Neumark-Sztainer D, Wall MM, Hannan PJ, Story M, Croll J, Perry C. Correlates of fruit and vegetable intake among adolescents: findings from Project EAT. *Prev Med* 2003;37(3):198-208.
16. Cusatis DC, Shannon BM. Influences on adolescent eating behavior. *J Adolesc Health* 1996;18(1):27-34.
17. Neumark-Sztainer D, Croll J, Story M, Hannan PJ, French S, Perry C. Ethnic/racial differences in weight-related concerns and behaviors among adolescent girls and boys: findings from Project EAT. *J Psychosom Res* 2002;53:963-74.
18. Neumark-Sztainer D, Wall M, Story M, Fulkerson JA. Are family meal patterns associated with disordered eating behaviors among adolescents? *J Adolesc Health* 2004;35(5):350-9.
19. Yanovski SZ. Binge eating disorder: Current knowledge and future directions. *Obes Res* 1993;1(4):306-24.
20. Harter S. Manual for the self-perception profile for adolescents. Denver CO: University of Denver, 1988.
21. Pingitore R, Spring B, Garfield D. Gender differences in body satisfaction. *Obes Res* 1997;5(5):402-9.
22. Secord PF, Jourard SM. The appraisal of body-cathexis: body cathexis and the self. *J Consult Clin Psychol* 1953;17(5):343-7.
23. Prochaska JJ, Rodgers MW, Sallis JF. Association of parent and peer support with adolescent physical activity. *Res Q Exerc Sport* 2002;73(2):206-10.
